# Supplementary material for: Data-driven risk stratification and precision management of pulmonary nodules detected on chest computed tomography
Source: PubMed Central journal article supplement — Nat Med. 2024 Sep 17;30(11):3184–95. doi: 10.1038/s41591-024-03211-3 (PMC11564084; doi:10.1038/s41591-024-03211-3), 2024-09-17
Supplement: 41591_2024_3211_MOESM1_ESM.pdf [file 41591_2024_3211_MOESM1_ESM.pdf]

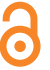

---

# Data-driven risk stratification and precision management of pulmonary nodules detected on chest computed tomography

---

In the format provided by the authors and unedited

---

## **Supplementary Information**

**Supplementary Table 1. Demographics of the lung screening trial participants in the primary dataset and the independent testing dataset.** Age is represented as median (25th, 75th percentiles).

**Supplementary Table 2. Weighting rule for the use of lung nodules in AI model training.** For nodules with pathological findings, their weights are set to 1, reflecting their accurate classification. For nodules without pathological findings, they are considered benign in model training, with weight varying from 1 to 0.25 as the risk level changes from 1 to 4.

**Supplementary Table 3. The number of pulmonary nodules with different risk levels in the primary dataset and the independent testing dataset.**

**Supplementary Table 4. Size distribution of the three types of nodules in the primary dataset and the independent testing dataset.** Each number is represented as median (25th, 75th percentiles, mm). Statistical analyses were performed among four categories using Kruskal-Wallis  $H$  tests, and the number of nodules in each category could be referred to Supplementary Table 3. All two-tailed  $P$  values among four categories were lower than 0.001.

**Supplementary Table 5. AUC values of Lung-RADS v2022 and C-Lung-RADS in distinguishing suspicious malignant nodules at Phase 1.** Each number is represented by mean and 95% confidence interval (CI). Statistical analyses were performed using ordinary two-way ANOVA followed by Sidak's multiple comparison tests, with two-tailed  $P$  values as follows.

**Supplementary Table 6. The FNR, FPR, PPV, and NPV in the Lung-RADS v2022 and C-Lung-RADS both based on nodule's density and size in Phase 1.** Statistical analyses were performed using chi-square tests, with two-tailed  $P$  values as follows.

**Supplementary Table 7. Demographics of participants at Phase 2.** Age is represented as median (25th, 75th percentiles). The age distribution of participants with benign and malignant nodules was compared using the Mann-Whitney  $U$  test with two-

tailed  $P$  values as follows. Statistical analysis of categorical variables was performed using the chi-square tests with two-tailed  $P$  values as follows.

**Supplementary Table 8. Distribution of the malignancy probability in single-, dual-, and multi-dimension models at Phase 2.** For the malignancy probability with asymmetrical distribution, it is represented as median (25th, 75th percentiles). To quantitatively compare the malignancy probability of the benign and the malignant, statistical analyses were performed using Mann-Whitney  $U$  tests, with two-tailed  $P$  values as follows.

**Supplementary Table 9. Quantitative metrics including AUC, accuracy, sensitivity, and specificity of the single-, dual-, and multi-dimension models in identifying the extremely high-risk nodules at Phase 2.** Each number is represented with the mean and 95% confidence interval (CI). Statistical analyses were performed using ordinary two-way ANOVA followed by Tukey's multiple comparison tests. The two-tailed adjusted  $P$  values were listed below.

**Supplementary Table 1. Demographics of the lung screening trial participants in the primary dataset and the independent testing dataset.** Age is represented as median (25th, 75th percentiles).

| Parameters<br>N(%)                          | Primary dataset |               |                  | Independent testing dataset |
|---------------------------------------------|-----------------|---------------|------------------|-----------------------------|
|                                             | Overall         | Training      | Internal testing |                             |
| <b>No. of participants</b>                  | 45064           | 36052         | 9012             | 14437                       |
| <b>Age (median, years)</b>                  | 47 (38, 56)     | 47 (38, 55)   | 47 (38, 56)      | 57 (51, 66)                 |
| < 45                                        | 18367 (40.8%)   | 14660 (40.7%) | 3707 (41.1%)     | 842 (5.8%)                  |
| ≥ 45 to < 60                                | 19237 (42.7%)   | 15448 (42.8%) | 3789 (42.1%)     | 7369 (51.1%)                |
| ≥ 60                                        | 7460 (16.5%)    | 5944 (16.5%)  | 1516 (16.8%)     | 6226 (43.1%)                |
| <b>Sex</b>                                  |                 |               |                  |                             |
| <b>Male</b>                                 | 26470 (58.7%)   | 21171 (58.7%) | 5299 (58.8%)     | 5118 (35.5%)                |
| <b>Female</b>                               | 18594 (41.3%)   | 14881 (41.3%) | 3713 (41.2%)     | 9319 (64.5%)                |
| <b>Smoking status</b>                       |                 |               |                  |                             |
| <b>Yes</b>                                  | 12361 (27.4%)   | 9919 (27.5%)  | 2442 (27.1%)     | 3309 (22.9%)                |
| <b>No</b>                                   | 32198 (71.5%)   | 25741 (71.4%) | 6457 (71.6%)     | 10866 (75.3%)               |
| <b>Unknown</b>                              | 505 (1.1%)      | 392 (1.1%)    | 113 (1.3%)       | 262 (1.8%)                  |
| <b>History of cancer</b>                    |                 |               |                  |                             |
| <b>Yes</b>                                  | 61 (0.1%)       | 44 (0.1%)     | 17 (0.2%)        | 129 (0.9%)                  |
| <b>No</b>                                   | 44255 (98.2%)   | 35425 (98.3%) | 8830 (98.0%)     | 11130 (77.1%)               |
| <b>Unknown</b>                              | 748 (1.7%)      | 583 (1.6%)    | 165 (1.8%)       | 3178 (22.0%)                |
| <b>Family history of cancer</b>             |                 |               |                  |                             |
| <b>Yes</b>                                  | 5835 (13.0%)    | 4647 (12.9%)  | 1188 (13.2%)     | 3723 (25.8%)                |
| <b>No</b>                                   | 38679 (85.8%)   | 30973 (85.9%) | 7706 (85.5%)     | 8611 (59.6%)                |
| <b>Unknown</b>                              | 550 (1.2%)      | 432 (1.2%)    | 118 (1.3%)       | 2103 (14.6%)                |
| <b>Family history of lung cancer</b>        |                 |               |                  |                             |
| <b>Yes</b>                                  | 1754 (3.9%)     | 1422 (3.9%)   | 332 (3.7%)       | 259 (1.8%)                  |
| <b>No</b>                                   | 42572 (94.5%)   | 34050 (94.5%) | 8522 (94.6%)     | 12075 (83.6%)               |
| <b>Unknown</b>                              | 738 (1.6%)      | 580 (1.6%)    | 158 (1.7%)       | 2103 (14.6%)                |
| <b>Ground truth</b>                         |                 |               |                  |                             |
| <b>Label 1</b>                              | 35291 (78.3%)   | 28253 (78.4%) | 7038 (78.1%)     | 11344 (78.6%)               |
| <b>Label 2</b>                              | 6918 (15.4%)    | 5559 (15.4%)  | 1359 (15.1%)     | 2208 (15.3%)                |
| <b>Label 3</b>                              | 877 (1.9%)      | 685 (1.9%)    | 192 (2.1%)       | 304 (2.1%)                  |
| <b>Label 4</b>                              | 1978 (4.4%)     | 1555 (4.3%)   | 423 (4.7%)       | 581 (4.0%)                  |
| <b>Pathologically confirmed lung cancer</b> |                 |               |                  |                             |
| <b>Yes</b>                                  | 1153 (2.6%)     | 909 (2.5%)    | 244 (2.7%)       | 139 (1.0%)                  |
| <b>No</b>                                   | 43911 (97.4%)   | 35143 (97.5%) | 8768 (97.3%)     | 14298 (99.0%)               |

**Supplementary Table 2. Weighting rule for the use of lung nodules in AI model training.** For nodules with pathological findings, their weights are set to 1, reflecting their accurate classification. For nodules without pathological findings, they are considered benign in model training, with weight varying from 1 to 0.25 as the risk level changes from 1 to 4.

|                          |                       | With pathological finding |                    | Without pathological findings |
|--------------------------|-----------------------|---------------------------|--------------------|-------------------------------|
|                          |                       | Malignant (Label = 1)     | Benign (Label = 0) | (Label = 0)                   |
| <b>Clinicians rating</b> | <b>Risk level = 1</b> | Weight = 1.00             | Weight = 1.00      | Weight = 1.00                 |
|                          | <b>Risk level = 2</b> | Weight = 1.00             | Weight = 1.00      | Weight = 0.75                 |
|                          | <b>Risk level = 3</b> | Weight = 1.00             | Weight = 1.00      | Weight = 0.50                 |
|                          | <b>Risk level = 4</b> | Weight = 1.00             | Weight = 1.00      | Weight = 0.25                 |

**Supplementary Table 3. The number of pulmonary nodules with different risk levels in the primary dataset and the independent testing dataset.**

| Type<br>N(%)                       | Overall         | Ground truth     |                 |               |                |
|------------------------------------|-----------------|------------------|-----------------|---------------|----------------|
|                                    |                 | Label 1          | Label 2         | Label 3       | Label 4        |
| <b>Primary dataset</b>             |                 |                  |                 |               |                |
| <b>All nodules</b>                 | 45064<br>(100%) | 35291<br>(78.3%) | 6918<br>(15.4%) | 877<br>(1.9%) | 1978<br>(4.4%) |
| <b>Solid nodules</b>               | 25129<br>(100%) | 22053<br>(87.8%) | 2416<br>(9.6%)  | 239<br>(0.9%) | 421<br>(1.7%)  |
| <b>mGGNs</b>                       | 2215<br>(100%)  | 674<br>(30.4%)   | 749<br>(33.8%)  | 118<br>(5.4%) | 674<br>(30.4%) |
| <b>pGGNs</b>                       | 17720<br>(100%) | 12564<br>(70.9%) | 3753<br>(21.2%) | 520<br>(2.9%) | 883<br>(5.0%)  |
| <b>Independent testing dataset</b> |                 |                  |                 |               |                |
| <b>All nodules</b>                 | 14437<br>(100%) | 11344<br>(78.6%) | 2208<br>(15.3%) | 304<br>(2.1%) | 581<br>(4.0%)  |
| <b>Solid nodules</b>               | 9807<br>(100%)  | 8447<br>(86.1%)  | 1014<br>(10.4%) | 167<br>(1.7%) | 179<br>(1.8%)  |
| <b>mGGNs</b>                       | 703<br>(100%)   | 251<br>(35.7%)   | 214<br>(30.5%)  | 41<br>(5.8%)  | 197<br>(28.0%) |
| <b>pGGNs</b>                       | 3927<br>(100%)  | 2646<br>(67.4%)  | 980<br>(25.0%)  | 96<br>(2.4%)  | 205<br>(5.2%)  |

mGGN, mixed ground glass nodule; pGGN, pure ground-glass nodule

**Supplementary Table 4. Size distribution of the three types of nodules in the primary dataset and the independent testing dataset.** Each number is represented as median (25th, 75th percentiles, mm). Statistical analyses were performed among four categories using Kruskal-Wallis  $H$  tests, and the number of nodules in each category could be referred to Supplementary Table 3. All two-tailed  $P$  values among four categories were lower than 0.001.

| Type                               | Overall               | Ground truth          |                        |                        |                         | $P$    |
|------------------------------------|-----------------------|-----------------------|------------------------|------------------------|-------------------------|--------|
|                                    |                       | Label 1               | Label 2                | Label 3                | Label 4                 |        |
| <b>Primary dataset</b>             |                       |                       |                        |                        |                         |        |
| <b>All nodules</b>                 | 4.90<br>(4.23, 5.81)  | 4.68<br>(4.13, 5.35)  | 6.10<br>(5.03, 7.55)   | 7.30<br>(5.87, 10.02)  | 10.22<br>(7.01, 14.97)  | <0.001 |
| <b>Solid nodules</b>               | 4.68<br>(4.11, 5.43)  | 4.56<br>(4.05, 5.20)  | 6.30<br>(5.12, 8.11)   | 8.96<br>(6.07, 11.93)  | 12.29<br>(8.51, 18.47)  | <0.001 |
| <b>mGGNs</b>                       | 9.79<br>(6.13, 14.50) | 5.82<br>(5.13, 7.21)  | 10.62<br>(6.73, 14.18) | 10.03<br>(7.17, 13.82) | 14.30<br>(10.40, 19.12) | <0.001 |
| <b>Solid components</b>            | 5.78<br>(3.55, 10.58) | 3.42<br>(1.30, 4.98)  | 6.62<br>(4.14, 10.64)  | 6.70<br>(4.66, 11.23)  | 9.80<br>(5.84, 15.05)   | <0.001 |
| <b>pGGNs</b>                       | 5.10<br>(4.40, 6.01)  | 4.85<br>(4.24, 5.54)  | 5.69<br>(4.86, 6.67)   | 6.70<br>(5.58, 8.79)   | 7.43<br>(6.39, 9.97)    | <0.001 |
| <b>Independent testing dataset</b> |                       |                       |                        |                        |                         |        |
| <b>All nodules</b>                 | 4.79<br>(3.96, 5.96)  | 4.52<br>(3.81, 5.39)  | 5.88<br>(4.84, 7.59)   | 7.47<br>(5.56, 10.82)  | 10.90<br>(7.40, 15.81)  | <0.001 |
| <b>Solid nodules</b>               | 4.62<br>(3.88, 5.60)  | 4.48<br>(3.79, 5.31)  | 5.80<br>(4.84, 7.25)   | 7.08<br>(5.17, 10.63)  | 12.71<br>(9.63, 20.15)  | <0.001 |
| <b>mGGNs</b>                       | 9.52<br>(6.36, 14.13) | 6.66<br>(5.37, 11.70) | 9.07<br>(6.41, 12.55)  | 10.70<br>(8.77, 12.49) | 13.64<br>(9.12, 16.83)  | <0.001 |
| <b>Solid components</b>            | 5.49<br>(3.07, 10.07) | 4.54<br>(1.50, 7.39)  | 4.81<br>(2.85, 8.03)   | 7.90<br>(5.67, 10.35)  | 9.02<br>(5.13, 14.42)   | <0.001 |
| <b>pGGNs</b>                       | 4.93<br>(4.05, 6.20)  | 4.57<br>(3.85, 5.49)  | 5.64<br>(4.68, 6.97)   | 6.60<br>(5.53, 9.15)   | 7.85<br>(6.31, 10.72)   | <0.001 |

mGGN, mixed ground glass nodule; pGGN, pure ground-glass nodule

**Supplementary Table 5. AUC values of Lung-RADS v2022 and C-Lung-RADS in distinguishing suspicious malignant nodules at Phase 1.** Each number is represented by mean and 95% confidence interval (CI). Statistical analyses were performed using ordinary two-way ANOVA followed by Sidak's multiple comparison tests, with two-tailed *P* values as follows.

|                                    | <b>Overall</b>         | <b>Solid nodules</b>   | <b>mGGNs</b>           | <b>pGGNs</b>           |
|------------------------------------|------------------------|------------------------|------------------------|------------------------|
| <b>Internal testing dataset</b>    |                        |                        |                        |                        |
| <b>Lung-RADS</b>                   | 0.761<br>(0.759-0.762) | 0.924<br>(0.922-0.927) | 0.697<br>(0.694-0.699) | 0.506<br>(0.506-0.507) |
| <b>C-Lung-RADS</b>                 | 0.899<br>(0.898-0.900) | 0.927<br>(0.925-0.930) | 0.710<br>(0.708-0.713) | 0.829<br>(0.827-0.830) |
| <b><i>P</i></b>                    | <0.001                 | 0.163                  | <0.001                 | <0.001                 |
| <b>Independent testing dataset</b> |                        |                        |                        |                        |
| <b>Lung-RADS</b>                   | 0.820<br>(0.817-0.822) | 0.973<br>(0.972-0.973) | 0.639<br>(0.636-0.641) | 0.499<br>(0.499-0.499) |
| <b>C-Lung-RADS</b>                 | 0.912<br>(0.911-0.913) | 0.974<br>(0.973-0.974) | 0.704<br>(0.701-0.706) | 0.799<br>(0.796-0.802) |
| <b><i>P</i></b>                    | <0.001                 | 0.764                  | <0.001                 | <0.001                 |

mGGN, mixed ground glass nodule; pGGN, pure ground-glass nodule



**Supplementary Table 6. The FNR, FPR, PPV, and NPV in the Lung-RADS v2022 and C-Lung-RADS both based on nodule's density and size in Phase 1.** Statistical analyses were performed using chi-square tests, with two-tailed *P* values as follows.

| Variables                          | C-Lung-RADS      |             | Lung-RADS        |             | <i>P</i> |
|------------------------------------|------------------|-------------|------------------|-------------|----------|
|                                    | % (95% CI)       | <i>n/N</i>  | % (95% CI)       | <i>n/N</i>  |          |
| <b>Internal testing dataset</b>    |                  |             |                  |             |          |
| <b>FNR</b>                         | 7.4 (4.7-11.4)   | 18/244      | 41.4 (35.4-47.7) | 101/244     | <0.001   |
| <b>FPR</b>                         | 20.8 (20.0-21.6) | 1823/8768   | 11.5 (10.8-12.2) | 1007/8768   | <0.001   |
| <b>PPV</b>                         | 11.0 (9.8-12.5)  | 226/2049    | 12.4 (10.7-14.5) | 143/1150    | 0.233    |
| <b>NPV</b>                         | 99.7 (99.6-99.8) | 6945/6963   | 98.7 (98.4-98.9) | 7761/7862   | <0.001   |
| <b>Independent testing dataset</b> |                  |             |                  |             |          |
| <b>FNR</b>                         | 3.6 (1.5-8.1)    | 5/139       | 24.5 (18.1-32.2) | 34/139      | <0.001   |
| <b>FPR</b>                         | 23.7 (23.0-24.4) | 3393/14298  | 16.4 (15.8-17.0) | 2350/14298  | <0.001   |
| <b>PPV</b>                         | 3.8 (3.2-4.5)    | 134/3527    | 4.3 (3.5-5.2)    | 105/2455    | 0.353    |
| <b>NPV</b>                         | 99.9 (99.9-99.9) | 10905/10910 | 99.7 (99.6-99.8) | 11948/11982 | <0.001   |

FNR, false negative rate; FPR, false positive rate; PPV, positive predictive value; NPV, negative predictive value.

**Supplementary Table 7. Demographics of participants at Phase 2.** Age is represented as median (25th, 75th percentiles). The age distribution of participants with benign and malignant nodules was compared using the Mann-Whitney *U* test with two-tailed *P* values as follows. Statistical analysis of categorical variables was performed using the chi-square tests with two-tailed *P* values as follows.

| Parameters<br>N(%)                   | Overall      | Benign       | Malignant   | <i>P</i> (Benign vs.<br>Malignant) |
|--------------------------------------|--------------|--------------|-------------|------------------------------------|
| <b>Training dataset</b>              |              |              |             |                                    |
| <b>No. of participants</b>           | 5452         | 4665         | 787         |                                    |
| <b>Age (median, years)</b>           | 50 (43, 57)  | 49 (42, 56)  | 53 (46, 62) | <0.001                             |
| < 45                                 | 1618 (29.7%) | 1439 (30.8%) | 179 (22.7%) | <0.001                             |
| ≥ 45 to < 60                         | 2765 (50.7%) | 2401 (51.5%) | 364 (46.3%) |                                    |
| ≥ 60                                 | 1069 (19.6%) | 825 (17.7%)  | 244 (31.0%) |                                    |
| <b>Sex</b>                           |              |              |             |                                    |
| <b>Male</b>                          | 3168 (58.1%) | 2854 (61.2%) | 314 (39.9%) | <0.001                             |
| <b>Female</b>                        | 2284 (41.9%) | 1811 (38.8%) | 473 (60.1%) |                                    |
| <b>Smoking status</b>                |              |              |             |                                    |
| <b>Yes</b>                           | 1601 (29.4%) | 1421 (30.5%) | 180 (22.9%) | <0.001                             |
| <b>No</b>                            | 3763 (69.0%) | 3225 (69.1%) | 538 (68.4%) |                                    |
| <b>Unknown</b>                       | 88 (1.6%)    | 19 (0.4%)    | 69 (8.7%)   |                                    |
| <b>History of cancer</b>             |              |              |             |                                    |
| <b>Yes</b>                           | 8 (0.1%)     | 2 (0.1%)     | 6 (0.8%)    | <0.001                             |
| <b>No</b>                            | 5189 (95.2%) | 4642 (99.5%) | 547 (69.5%) |                                    |
| <b>Unknown</b>                       | 255 (4.7%)   | 21 (0.4%)    | 234(29.7%)  |                                    |
| <b>Family history of cancer</b>      |              |              |             |                                    |
| <b>Yes</b>                           | 865 (15.9%)  | 679 (14.5%)  | 186 (23.6%) | <0.001                             |
| <b>No</b>                            | 4459 (81.8%) | 3969 (85.1%) | 490 (62.3%) |                                    |
| <b>Unknown</b>                       | 128 (2.3%)   | 17 (0.4%)    | 111 (14.1%) |                                    |
| <b>Family history of lung cancer</b> |              |              |             |                                    |
| <b>Yes</b>                           | 265 (4.9%)   | 228 (4.9%)   | 37 (4.7%)   | <0.001                             |
| <b>No</b>                            | 4935 (90.5%) | 4419 (94.7%) | 516 (65.6%) |                                    |
| <b>Unknown</b>                       | 252 (4.6%)   | 18 (0.4%)    | 234 (29.7%) |                                    |
| <b>Internal testing dataset</b>      |              |              |             |                                    |
| <b>No. of participants</b>           | 1351         | 1142         | 209         |                                    |
| <b>Age (median, years)</b>           | 50 (42, 58)  | 50 (42, 57)  | 54 (45, 64) | <0.001                             |
| < 45                                 | 427 (31.6%)  | 375 (32.8%)  | 52 (24.9%)  | <0.001                             |
| ≥ 45 to < 60                         | 628 (46.5%)  | 545 (47.7%)  | 83 (39.7%)  |                                    |
| ≥ 60                                 | 296 (21.9%)  | 222 (19.5%)  | 74 (35.4%)  |                                    |
| <b>Sex</b>                           |              |              |             |                                    |
| <b>Male</b>                          | 774 (57.3%)  | 685 (60.0%)  | 89 (42.6%)  | <0.001                             |
| <b>Female</b>                        | 577 (42.7%)  | 457 (40.0%)  | 120 (57.4%) |                                    |

|                                      |              |              |               |        |
|--------------------------------------|--------------|--------------|---------------|--------|
| <b>Smoking status</b>                |              |              |               |        |
| Yes                                  | 380 (28.1%)  | 331 (29%)    | 49 (23.4%)    | <0.001 |
| No                                   | 946 (70.0%)  | 809 (70.8%)  | 137 (65.6%)   |        |
| Unknown                              | 25 (1.9%)    | 2 (0.2%)     | 23 (11.0%)    |        |
| <b>History of cancer</b>             |              |              |               |        |
| Yes                                  | 6 (0.4%)     | 1 (0.1%)     | 5 (2.4%)      | <0.001 |
| No                                   | 1283 (95.0%) | 1139 (99.7%) | 144 (68.9%)   |        |
| Unknown                              | 62 (4.6%)    | 2 (0.2%)     | 60 (28.7%)    |        |
| <b>Family history of cancer</b>      |              |              |               |        |
| Yes                                  | 203 (15%)    | 173 (15.1%)  | 30 (14.3%)    | <0.001 |
| No                                   | 1117 (82.7%) | 967 (84.7%)  | 150 (71.8%)   |        |
| Unknown                              | 31 (2.3%)    | 2 (0.2%)     | 29 (13.9%)    |        |
| <b>Family history of lung cancer</b> |              |              |               |        |
| Yes                                  | 50 (3.7%)    | 47 (4.1%)    | 3 (1.4%)      | <0.001 |
| No                                   | 1239 (91.7%) | 1093 (95.7%) | 146 (69.9%)   |        |
| Unknown                              | 62 (4.6%)    | 2 (0.2%)     | 60 (28.7%)    |        |
| <b>Independent testing dataset</b>   |              |              |               |        |
| No. of participants                  | 1951         | 1812         | 139           |        |
| Age (median, years)                  | 62 (54, 68)  | 62 (54, 68)  | 62.0 (54, 67) | 0.192  |
| < 45                                 | 49 (2.5%)    | 43 (2.4%)    | 6 (4.3%)      | 0.233  |
| ≥ 45 to < 60                         | 820 (42.0%)  | 768 (42.4%)  | 52 (37.4%)    |        |
| ≥ 60                                 | 1082 (55.5%) | 1001 (55.2%) | 81 (58.3%)    |        |
| <b>Sex</b>                           |              |              |               |        |
| Male                                 | 727 (37.3%)  | 685 (37.8%)  | 42 (30.2%)    | 0.075  |
| Female                               | 1224 (62.7%) | 1127 (62.2%) | 97 (69.8%)    |        |
| <b>Smoking status</b>                |              |              |               |        |
| Yes                                  | 477 (24.5%)  | 449 (24.8%)  | 28 (20.2%)    | 0.439  |
| No                                   | 1440 (73.8%) | 1331 (73.4%) | 109 (78.4%)   |        |
| Unknown                              | 34 (1.7%)    | 32 (1.8%)    | 2 (1.4%)      |        |
| <b>History of cancer</b>             |              |              |               |        |
| Yes                                  | 22 (1.1%)    | 22 (1.2%)    | 0 (0)         | 0.005  |
| No                                   | 1548 (79.4%) | 1450 (80%)   | 98 (70.5%)    |        |
| Unknown                              | 381 (19.5%)  | 340 (18.8%)  | 41 (29.5%)    |        |
| <b>Family history of cancer</b>      |              |              |               |        |
| Yes                                  | 1407 (72.1%) | 1368 (75.5%) | 39 (28.1%)    | <0.001 |
| No                                   | 518 (26.6%)  | 441 (24.3%)  | 77 (55.4%)    |        |
| Unknown                              | 26 (1.3%)    | 3 (0.2%)     | 23 (16.5%)    |        |
| <b>Family history of lung cancer</b> |              |              |               |        |
| Yes                                  | 22 (1.1%)    | 18 (1.0%)    | 4 (2.9%)      | <0.001 |
| No                                   | 1903 (97.6%) | 1791 (98.8%) | 112 (80.6%)   |        |
| Unknown                              | 26 (1.3%)    | 3 (0.2%)     | 23 (16.5%)    |        |

**Supplementary Table 8. Distribution of the malignancy probability in single-, dual-, and multi-dimension models at Phase 2.** For the malignancy probability with asymmetrical distribution, it is represented as median (25th, 75th percentiles). To quantitatively compare the malignancy probability of the benign and the malignant, statistical analyses were performed using Mann-Whitney  $U$  tests, with two-tailed  $P$  values as follows.

| <b>Datasets</b>                                               | <b>Benign</b>        | <b>Malignant</b>     | <b><math>P</math>(Benign vs. Malignant)</b> |
|---------------------------------------------------------------|----------------------|----------------------|---------------------------------------------|
| <b>Training dataset</b>                                       |                      |                      |                                             |
| <b>Single-dimension model (Imaging)</b>                       | 0.236 (0.150, 0.290) | 0.653 (0.483, 0.742) | <0.001                                      |
| <b>Dual-dimension model (Imaging + Clinical)</b>              | 0.282 (0.197, 0.353) | 0.713 (0.550, 0.802) | <0.001                                      |
| <b>Multi-dimension model (Imaging + Clinical + Follow-up)</b> | 0.288 (0.205, 0.363) | 0.753 (0.570, 0.870) | <0.001                                      |
| <b>Internal testing dataset</b>                               |                      |                      |                                             |
| <b>Single-dimension model</b>                                 | 0.232 (0.154, 0.290) | 0.706 (0.530, 0.783) | < 0.001                                     |
| <b>Dual-dimension model</b>                                   | 0.283 (0.196, 0.353) | 0.752 (0.579, 0.832) | < 0.001                                     |
| <b>Multi-dimension model</b>                                  | 0.290 (0.203, 0.358) | 0.808 (0.653, 0.911) | < 0.001                                     |
| <b>Independent testing dataset</b>                            |                      |                      |                                             |
| <b>Single-dimension model</b>                                 | 0.195 (0.130, 0.290) | 0.656 (0.440, 0.767) | <0.001                                      |
| <b>Dual-dimension model</b>                                   | 0.256 (0.185, 0.353) | 0.713 (0.502, 0.830) | <0.001                                      |
| <b>Multi-dimension model</b>                                  | 0.259 (0.189, 0.354) | 0.713 (0.535, 0.834) | <0.001                                      |

**Supplementary Table 9. Quantitative metrics including AUC, accuracy, sensitivity, and specificity of the single-, dual-, and multi-dimension models in identifying the extremely high-risk nodules at Phase 2.** Each number is represented with the mean and 95% confidence interval (CI). Statistical analyses were performed using ordinary two-way ANOVA followed by Tukey’s multiple comparison tests. The two-tailed adjusted *P* values were listed below.

| <b>Datasets</b>                    | <b>Single-dimension</b> | <b>Dual-dimension</b>  | <b>Multi-dimension</b> | <i>P</i> (Single-<br>vs. Dual-<br>dimension) | <i>P</i> (Single-<br>vs. Multi-<br>dimension) | <i>P</i> (Dual-<br>vs. Multi-<br>dimension) |
|------------------------------------|-------------------------|------------------------|------------------------|----------------------------------------------|-----------------------------------------------|---------------------------------------------|
| <b>Internal testing dataset</b>    |                         |                        |                        |                                              |                                               |                                             |
| <b>AUC</b>                         | 0.881<br>(0.880-0.882)  | 0.882<br>(0.881-0.883) | 0.918<br>(0.918-0.919) | 0.451                                        | < 0.001                                       | < 0.001                                     |
| <b>Accuracy</b>                    | 0.832<br>(0.831-0.832)  | 0.828<br>(0.827-0.828) | 0.829<br>(0.829-0.830) | < 0.001                                      | < 0.001                                       | 0.025                                       |
| <b>Sensitivity</b>                 | 79.6%<br>(79.4%-79.7%)  | 82.4%<br>(82.2%-82.5%) | 85.1%<br>(85.0%-85.3%) | < 0.001                                      | < 0.001                                       | < 0.001                                     |
| <b>Specificity</b>                 | 83.4%<br>(83.4%-0.835)  | 82.8%<br>(82.8%-82.9%) | 82.8%<br>(82.8%-82.9%) | < 0.001                                      | < 0.001                                       | 1.000                                       |
| <b>Independent testing dataset</b> |                         |                        |                        |                                              |                                               |                                             |
| <b>AUC</b>                         | 0.924<br>(0.923-0.926)  | 0.926<br>(0.924-0.927) | 0.927<br>(0.926-0.928) | 0.876                                        | 0.565                                         | 0.857                                       |
| <b>Accuracy</b>                    | 0.882<br>(0.881-0.882)  | 0.877<br>(0.876-0.877) | 0.877<br>(0.876-0.877) | 0.067                                        | 0.068                                         | 1.000                                       |
| <b>Sensitivity</b>                 | 64.3%<br>(63.6%-65.1%)  | 78.3%<br>(77.8%-78.9%) | 85.6%<br>(85.1%-86.1%) | <0.001                                       | <0.001                                        | <0.001                                      |
| <b>Specificity</b>                 | 88.4%<br>(88.3%-88.5%)  | 87.8%<br>(87.7%-87.8%) | 87.7%<br>(87.6%-87.7%) | 0.012                                        | 0.004                                         | 0.946                                       |

AUC, area under the curve.
