# Supplementary material for: Data-driven risk stratification and precision management of pulmonary nodules detected on chest computed tomography
Source: PubMed Central journal article supplement — Nat Med. 2024 Sep 17;30(11):3184–95. doi: 10.1038/s41591-024-03211-3 (PMC11564084; doi:10.1038/s41591-024-03211-3), 2024-09-17
Supplement: 41591_2024_3211_MOESM2_ESM.pdf [file 41591_2024_3211_MOESM2_ESM.pdf]

## Reporting Summary

Nature Portfolio wishes to improve the reproducibility of the work that we publish. This form provides structure for consistency and transparency in reporting. For further information on Nature Portfolio policies, see our [Editorial Policies](#) and the [Editorial Policy Checklist](#).

### Statistics

For all statistical analyses, confirm that the following items are present in the figure legend, table legend, main text, or Methods section.

n/a Confirmed

- The exact sample size ( $n$ ) for each experimental group/condition, given as a discrete number and unit of measurement
- A statement on whether measurements were taken from distinct samples or whether the same sample was measured repeatedly
- The statistical test(s) used AND whether they are one- or two-sided  
*Only common tests should be described solely by name; describe more complex techniques in the Methods section.*
- A description of all covariates tested
- A description of any assumptions or corrections, such as tests of normality and adjustment for multiple comparisons
- A full description of the statistical parameters including central tendency (e.g. means) or other basic estimates (e.g. regression coefficient) AND variation (e.g. standard deviation) or associated estimates of uncertainty (e.g. confidence intervals)
- For null hypothesis testing, the test statistic (e.g.  $F$ ,  $t$ ,  $r$ ) with confidence intervals, effect sizes, degrees of freedom and  $P$  value noted  
*Give  $P$  values as exact values whenever suitable.*
- For Bayesian analysis, information on the choice of priors and Markov chain Monte Carlo settings
- For hierarchical and complex designs, identification of the appropriate level for tests and full reporting of outcomes
- Estimates of effect sizes (e.g. Cohen's  $d$ , Pearson's  $r$ ), indicating how they were calculated

*Our web collection on [statistics for biologists](#) contains articles on many of the points above.*

### Software and code

Policy information about [availability of computer code](#)

Data collection

Data analysis

For manuscripts utilizing custom algorithms or software that are central to the research but not yet described in published literature, software must be made available to editors and reviewers. We strongly encourage code deposition in a community repository (e.g. GitHub). See the Nature Portfolio [guidelines for submitting code & software](#) for further information.

### Data

Policy information about [availability of data](#)

All manuscripts must include a [data availability statement](#). This statement should provide the following information, where applicable:

- Accession codes, unique identifiers, or web links for publicly available datasets
- A description of any restrictions on data availability
- For clinical datasets or third party data, please ensure that the statement adheres to our [policy](#)

The relevant images supporting the experiment in this paper are from the Medical Checkup cohort (N=45,064) and the Mobile Screening Cohort (N=14,437). The full datasets are protected because of privacy issues and regulation policies in West China Hospital of Sichuan University.

## Research involving human participants, their data, or biological material

Policy information about studies with [human participants or human data](#). See also policy information about [sex, gender \(identity/presentation\), and sexual orientation](#) and [race, ethnicity and racism](#).

|                                                                    |                                                                                                                                                                                                                                                                                                                                                                                                                                                                                        |
|--------------------------------------------------------------------|----------------------------------------------------------------------------------------------------------------------------------------------------------------------------------------------------------------------------------------------------------------------------------------------------------------------------------------------------------------------------------------------------------------------------------------------------------------------------------------|
| Reporting on sex and gender                                        | Sex was equally considered in the study design. The proposed algorithm could be suitable for people of all sexes.                                                                                                                                                                                                                                                                                                                                                                      |
| Reporting on race, ethnicity, or other socially relevant groupings | Information on race, ethnicity, or other socially relevant grouping was not collected.                                                                                                                                                                                                                                                                                                                                                                                                 |
| Population characteristics                                         | A total of 45,064 participants from the Medical Checkup Cohort and 14,437 participants in a Mobile Screening Cohort with lung nodules were included in the study. In primary dataset, their median age was 47 years, 58.7% were men and 71.5% had never smoked. Meanwhile, the mean age was 57 years in the independent testing dataset with a majority of 64.5% females and 75.3% non-smokers. The more details of population characteristics were provided in Supplementary Table 1. |
| Recruitment                                                        | This was a retrospective study with no specific recruitment requirements.                                                                                                                                                                                                                                                                                                                                                                                                              |
| Ethics oversight                                                   | This study was approved by the Research Ethics Committee in West China Hospital of Sichuan University.                                                                                                                                                                                                                                                                                                                                                                                 |

Note that full information on the approval of the study protocol must also be provided in the manuscript.

## Field-specific reporting

Please select the one below that is the best fit for your research. If you are not sure, read the appropriate sections before making your selection.

Life sciences  Behavioural & social sciences  Ecological, evolutionary & environmental sciences

For a reference copy of the document with all sections, see [nature.com/documents/nr-reporting-summary-flat.pdf](https://www.nature.com/documents/nr-reporting-summary-flat.pdf)

## Life sciences study design

All studies must disclose on these points even when the disclosure is negative.

|                 |                                                                                                                                                                                                                                                                                                                                                                                                                |
|-----------------|----------------------------------------------------------------------------------------------------------------------------------------------------------------------------------------------------------------------------------------------------------------------------------------------------------------------------------------------------------------------------------------------------------------|
| Sample size     | The sample sizes for the primary dataset and independent testing dataset are 45,064 and 14,437 respectively.                                                                                                                                                                                                                                                                                                   |
| Data exclusions | Participants were excluded from study enrollment if they met any of the following criteria: (1) received any surgical resection of pulmonary nodules before enrollment, (2) combined with other serious lung diseases such as pulmonary fibrosis and bronchiectasis, and (3) chest CT images quality failed to meet the required standards, CT volumes with <50 slices or patients with no qualifying volumes. |
| Replication     | Replication was not relevant. We used independent cohorts.                                                                                                                                                                                                                                                                                                                                                     |
| Randomization   | We randomly split primary dataset as training and internal testing sets in Figure S1, where the internal testing set accounted for 20%.                                                                                                                                                                                                                                                                        |
| Blinding        | The process was blinding. During image processing, all images were first de-identified to remove any patient related information.                                                                                                                                                                                                                                                                              |

## Reporting for specific materials, systems and methods

We require information from authors about some types of materials, experimental systems and methods used in many studies. Here, indicate whether each material, system or method listed is relevant to your study. If you are not sure if a list item applies to your research, read the appropriate section before selecting a response.

### Materials & experimental systems

| n/a                                 | Involved in the study                                  |
|-------------------------------------|--------------------------------------------------------|
| <input checked="" type="checkbox"/> | <input type="checkbox"/> Antibodies                    |
| <input checked="" type="checkbox"/> | <input type="checkbox"/> Eukaryotic cell lines         |
| <input checked="" type="checkbox"/> | <input type="checkbox"/> Palaeontology and archaeology |
| <input checked="" type="checkbox"/> | <input type="checkbox"/> Animals and other organisms   |
| <input checked="" type="checkbox"/> | <input type="checkbox"/> Clinical data                 |
| <input checked="" type="checkbox"/> | <input type="checkbox"/> Dual use research of concern  |
| <input checked="" type="checkbox"/> | <input type="checkbox"/> Plants                        |

### Methods

| n/a                                 | Involved in the study                           |
|-------------------------------------|-------------------------------------------------|
| <input checked="" type="checkbox"/> | <input type="checkbox"/> ChIP-seq               |
| <input checked="" type="checkbox"/> | <input type="checkbox"/> Flow cytometry         |
| <input checked="" type="checkbox"/> | <input type="checkbox"/> MRI-based neuroimaging |
